# Supplementary material
Source: Royal Society of Chemistry journal article supplement (doi:10.1039/d6cp00668j)
Supplement: d6cp00668j1.pdf [file d6cp00668j1.pdf]

## Electronic Supplementary Information (ESI) for

### **Tunable disruption of pseudoisocyanine J-aggregates by choline chloride-based deep eutectic solvents**

Moumita Saha,<sup>a</sup> Juhi Saraswat,<sup>b</sup> Gary A. Baker,<sup>c</sup> Kamalakanta Behera,<sup>\*d</sup> and Shruti Trivedi<sup>\*a</sup>

<sup>a</sup> Department of Chemistry, Institute of Science, Banaras Hindu University, Varanasi, 221005, India

<sup>b</sup> Centre for Interdisciplinary Research in Basic Sciences, Jamia Millia Islamia, New Delhi, 110025, India

<sup>c</sup> Department of Chemistry, University of Missouri, Columbia, Missouri, 65211, United States

<sup>d</sup> Department of Chemistry, University of Allahabad, Prayagraj, 211002, India

#### **\*Corresponding Author**

Dr. Shruti Trivedi

Email: shrutitrivedi@bhu.ac.in

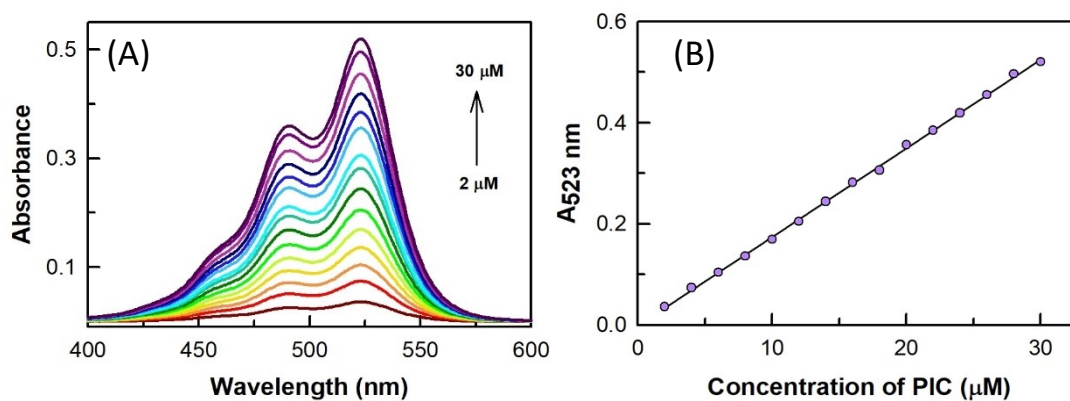

**Fig. S1** (A) UV-Vis absorbance spectra of PIC in water at concentrations ranging from 2–30  $\mu\text{M}$ . (B) Plot of absorbance at 523 nm versus PIC concentration, showing a rigorously linear increase consistent with Beer-Lambert law behavior and maintenance of the monomeric form of PIC over this concentration range. The recovered molar extinction coefficient obtained from the linear fit shown is  $18,500 \text{ M}^{-1} \text{ cm}^{-1}$ .

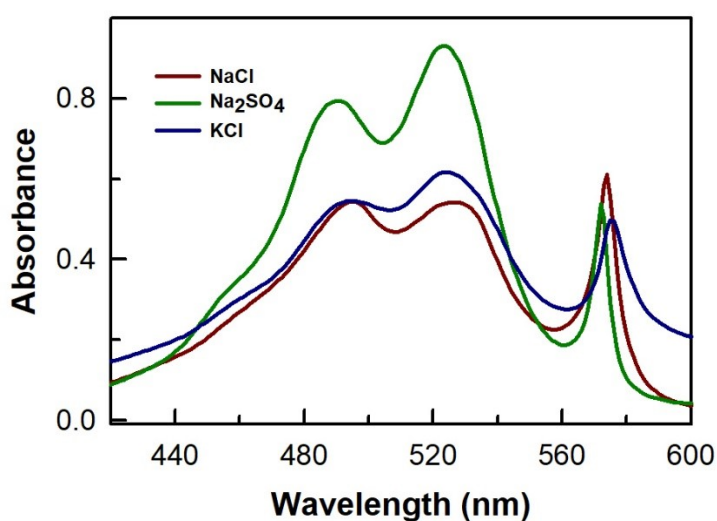

**Fig. S2** Absorbance spectra of  $300 \mu\text{M}$  PIC in aqueous solutions containing  $5.0 \text{ M}$  NaCl,  $1.5 \text{ M}$   $\text{Na}_2\text{SO}_4$ , and  $2.5 \text{ M}$  KCl, illustrating the emergence of the characteristic sharp J-aggregate band near  $574 \text{ nm}$  in high ionic strength media.

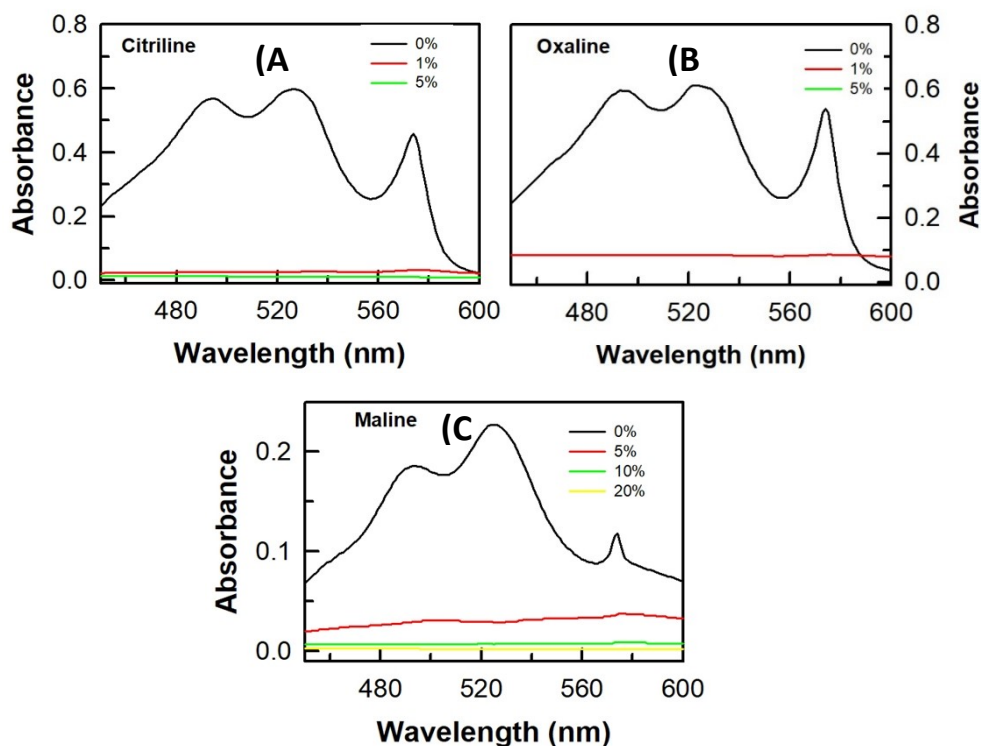

**Fig. S3** Absorbance spectra of 300  $\mu\text{M}$  PIC in 5.0 M NaCl in the presence of varying percentages (v/v) of (A) Citriline, (B) Oxaline, and (C) Maline. The addition of these DESs results in a marked decrease in overall absorbance intensity, consistent with either precipitation or chemical degradation of PIC under these conditions.

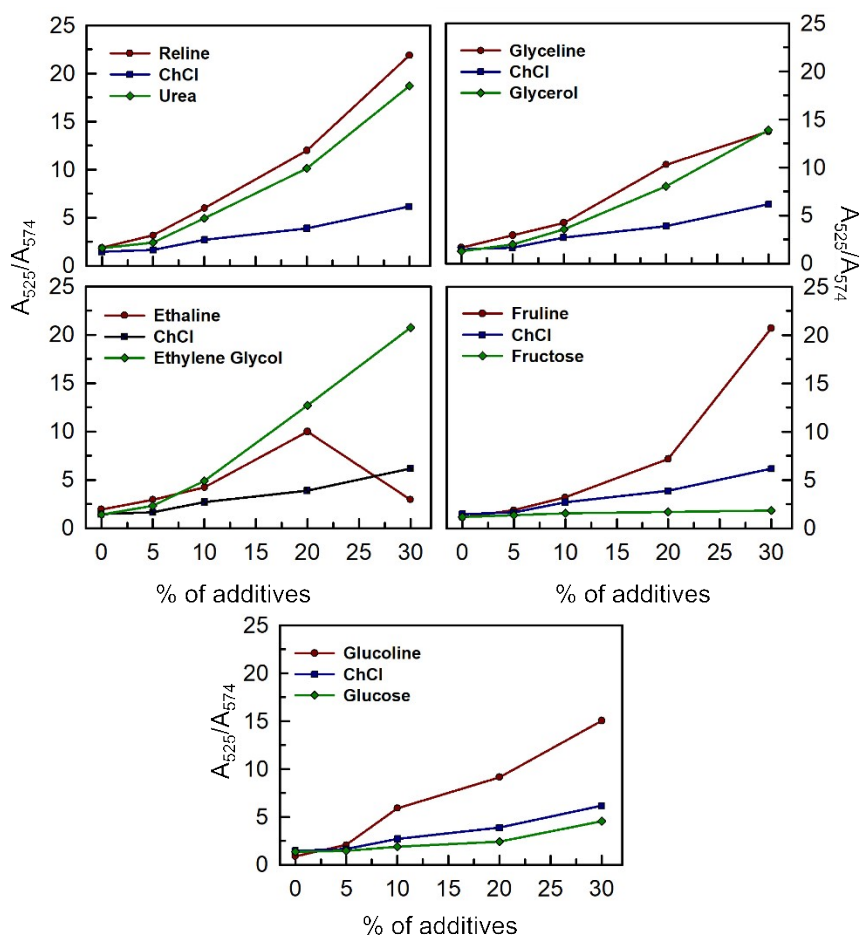

**Fig. S4** Variation in ratio of absorbance at 525 nm and 574 nm peak of PIC by addition of various % of DESs and their individual components.

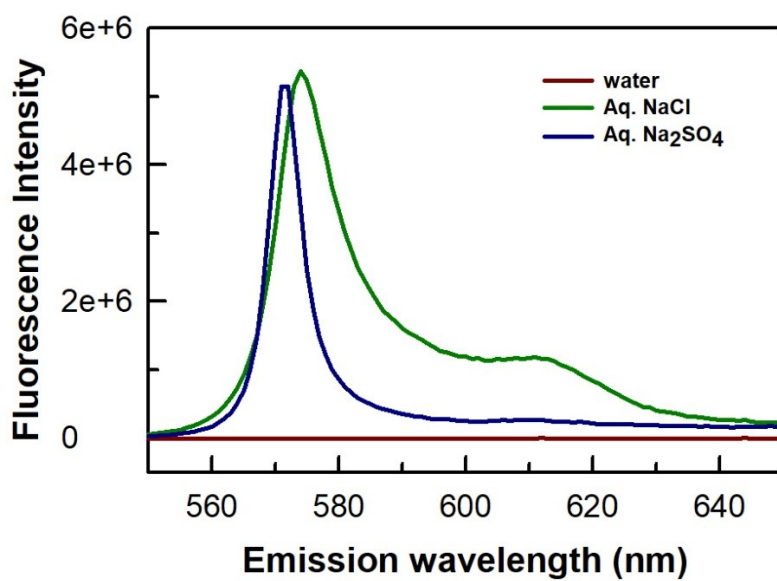

**Fig. S5** Fluorescence emission spectra of 100  $\mu\text{M}$  PIC in water and in 5.0 M NaCl (*aq*), together with 300  $\mu\text{M}$  PIC in 1.5 M Na<sub>2</sub>SO<sub>4</sub> (*aq*), highlighting salt- and concentration-dependent variations in emission behavior.

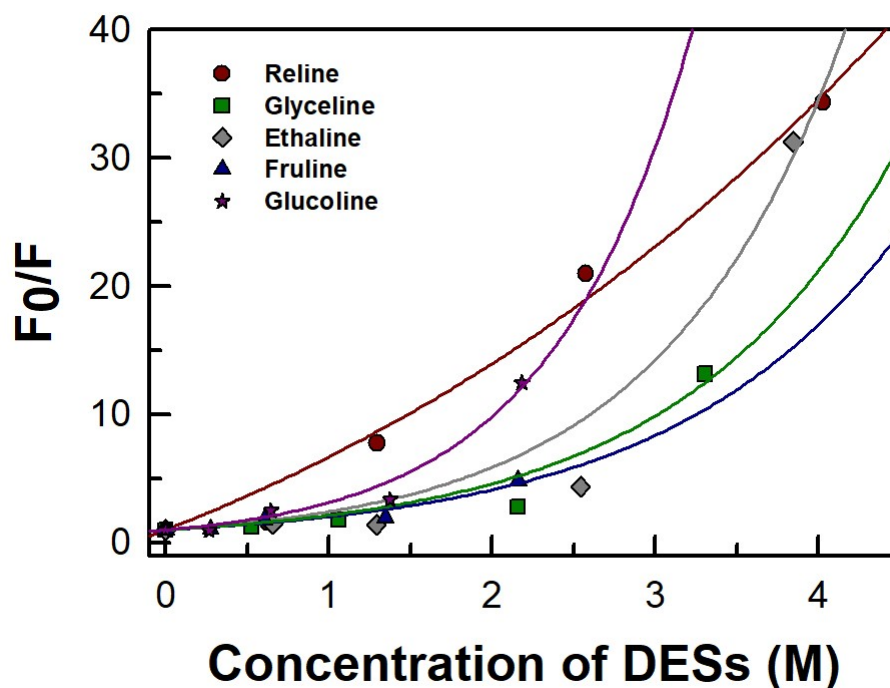

**Fig. S6** Stern–Volmer plots ( $F_0/F$  versus DES concentration) illustrating progressive quenching of PIC fluorescence in 5.0 M NaCl (*aq*) upon addition of the indicated DESs. The pronounced upward curvature in the Stern–Volmer plots prompted analysis within a “sphere of action” static quenching model.

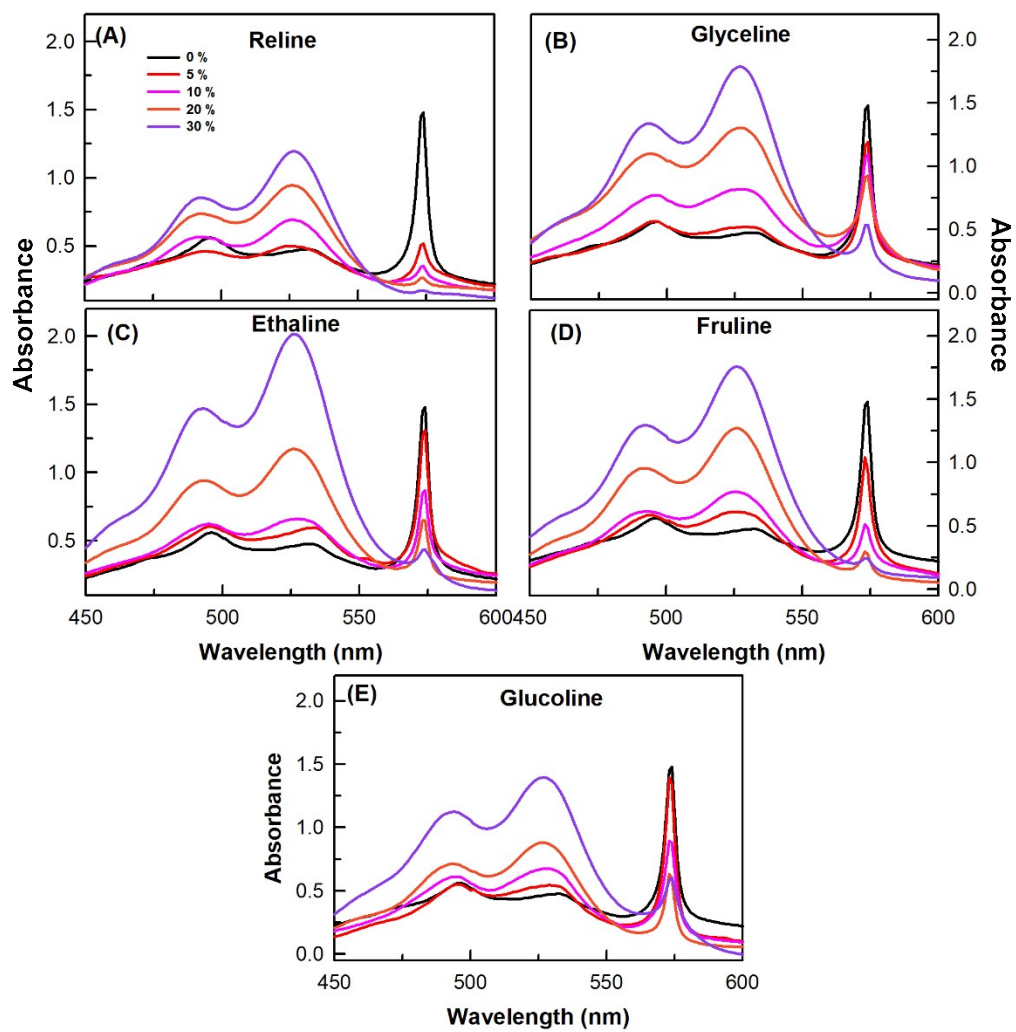

**Fig. S7** Absorbance spectra of 300  $\mu\text{M}$  PIC in aqueous 5.0 M NaCl containing varying percentages (0 to 30%, v/v) of (A) Reline, (B) Glyceline, (C) Ethaline, (D) Fruline, and (E) Glucoline, recorded at 10  $^{\circ}\text{C}$ .
